# Supplementary material
Source: HighWire-hosted journal article supplement (https://gh.bmj.com/content/3/2/e000674)
Supplement: inline-supplementary-material-1 [file inline-supplementary-material-1.pdf]

1 **Supplement**

2

3 This Supplement provides a detailed review of the Partners In Health – Rwanda Ministry of Health  
4 intervention under evaluation, and additional technical information about how data were collected and  
5 analyzed.

6

7 **1. PIH-RMOH intervention**

8

9 Table s1. Three levels of health care delivery in PIH-RMOH intervention in Kirehe/S. Kayonza

|                                                                                                                                                                                                                                                                                                                                                                                                                                                                                                                                                                                                                                                                                                                                                                                                                                                                                                                                                                                                                                                                                                                                                                                                                                            |
|--------------------------------------------------------------------------------------------------------------------------------------------------------------------------------------------------------------------------------------------------------------------------------------------------------------------------------------------------------------------------------------------------------------------------------------------------------------------------------------------------------------------------------------------------------------------------------------------------------------------------------------------------------------------------------------------------------------------------------------------------------------------------------------------------------------------------------------------------------------------------------------------------------------------------------------------------------------------------------------------------------------------------------------------------------------------------------------------------------------------------------------------------------------------------------------------------------------------------------------------|
| <b>District Hospitals (1 in Kirehe and 1 in S. Kayonza)</b>                                                                                                                                                                                                                                                                                                                                                                                                                                                                                                                                                                                                                                                                                                                                                                                                                                                                                                                                                                                                                                                                                                                                                                                |
| Full renovation of abandoned hospital for 95-bed facility in S. Kayonza. Constructed 140-bed district hospital in Kirehe. Each included: electricity, water and sanitation, emergency room, operating room, laboratory, kitchen, and wards for obstetrics, internal medicine, pediatrics, post-surgery, oncology, and tuberculosis. Services included blood transfusions, radiology, ultrasound, electrocardiogram, outpatient specialty consultations (dentistry, high-risk pregnancies, orthopedics, mental health), and social work. Both established an ambulance network, electronic medical records (EMRs), strengthened supply chain management, and forecasting for drugs and consumables. Hospitals were staffed to GoR norms: 12 doctors, 60+ nurses, 7 laboratory technicians among others; <sup>1,2</sup> they received trainings in obstetrics, pediatrics, internal medicine, infectious disease, malnutrition, organizational management, and mentorship from specialty doctors (often foreign trained). PIH supported insurance ( <i>mutuelles</i> ) for indigents, and covered point-of-service fees for any patients that could not pay. Staff received additional incentives through performance-based financing (PBF). |
| <b>Health Centers (12 in Kirehe and 8 in S. Kayonza)</b>                                                                                                                                                                                                                                                                                                                                                                                                                                                                                                                                                                                                                                                                                                                                                                                                                                                                                                                                                                                                                                                                                                                                                                                   |
| Six health centers (4 in Kirehe, 2 in S. Kayonza) received infrastructure upgrades that included: electricity, internet, water and sanitation, furniture/equipment, pharmacy, and 5-10 bed inpatient wards. They were capacitated for: maternal care (pre-natal and post-partum); malnutrition diagnosis and treatment; integrated management of childhood illness (IMCI) protocols; childhood vaccinations, HIV diagnosis and treatment; and chronic care (NCD). Health Centers were staffed to GOR norms: 17 nurses, 2 laboratory technicians, and 9 other staff. <sup>1,2</sup> including social workers in six health centers that treated HIV. Staff received regular trainings in IMCI, urgent obstetrical neonatal care, malnutrition, HIV, TB, family planning, pre-natal care, and NCDs. They each strengthened registry and reports health management information system (HMIS), supply chains, and pharmacies. Staff received additional incentives through performance-based financing (PBF).                                                                                                                                                                                                                                  |
| <b>Comprehensive Community Health Worker System (800+)</b>                                                                                                                                                                                                                                                                                                                                                                                                                                                                                                                                                                                                                                                                                                                                                                                                                                                                                                                                                                                                                                                                                                                                                                                 |
| Three community health workers (CHWs) served 2-3 villages (~80 to 150 households) in both districts with support from 2-5 higher educated supervisors in each Cell (4 <sup>th</sup> -level administrative unit). CHWs were trained and equipped for community IMCI, maternal health, hygiene and sanitation, and malnutrition by the district hospital community health supervisor, and they reported monthly into a performance-based financing system. <sup>3</sup> In S. Kayonza, CHWs rounded every household once per month. HIV/AIDS, TB, and NCDs were managed by daily visits by one <i>accompagneur</i> per 3 to 5 patients.                                                                                                                                                                                                                                                                                                                                                                                                                                                                                                                                                                                                      |

10

11

12 *2. Survey design*

13

14 Demographic and Health Surveys (DHSs) are standardized household surveys that have been conducted  
15 in dozens of countries worldwide roughly every five years since the early 1980s. DHSs focus on  
16 maternal and child health, and since the early 2000s, ask for blood samples from respondents to test  
17 for anemia, malaria, HIV, and other illnesses. The 2005 and 2010 DHSs in Rwanda were the third and  
18 fourth of their kind.

19

20 The 2005 Rwanda DHS selected 10,644 households representing urban and rural communities in each  
21 of the 12 old provinces, and the 2010 Rwanda DHS selected 12,792 households representing urban and  
22 rural communities in each of the 30 newly-defined districts. A two-staged cluster design was employed  
23 in which primary sampling units (PSUs) at the community-level were selected with probability  
24 proportionate to size. In the 2005 survey, 462 PSUs were selected from a list of enumeration areas  
25 generated by the 2002 census. In the 2010 survey, 492 PSUs were selected from a list of villages  
26 generated in preparation for the 2012 census.

27

28 In the second stage of sampling, household listing teams travelled to each of the selected PSUs and  
29 hand-mapped all dwellings. From each map, 20-24 households were systematically selected in 2005,  
30 and 13 households were systematically selected in 2010 with equal probability. A GPS coordinate of  
31 each PSU was recorded and randomly geographically displaced up to 5km in rural areas, and up to 2km  
32 in urban areas and camps, to anonymize the identity of respondents and their communities. In rural  
33 areas, one in every 100 PSUs was displaced up to 10km to ensure anonymity in sparsely populated  
34 areas.

35

36 In each selected dwelling, one adult was invited to complete a household questionnaire in which s/he  
37 reported household assets, and a listing of all household members with key demographic

38 characteristics. All women age 15 to 49 who were usual residents and slept in the dwelling the night  
39 before the interview were invited to complete the women's questionnaire which asked about health  
40 outcomes; personal sociodemographic characteristics; and about health and demographic  
41 characteristics of each child. Height and weight was measured in women and all children under age five  
42 who were present in the household. Men age 15 to 59 were also sampled, and additional protocols and  
43 questionnaire were used to collect blood samples for HIV and other blood testing.

44  
45 Interviewers received three weeks of standardized training which included establishment of privacy for  
46 interviewing,<sup>4</sup> and ensuring informed, voluntary verbal consent before interviewing with the  
47 interviewer recorded her/his own signature and the date. Verbal, rather than written, consent was  
48 obtained because illiteracy is high in Rwanda. In 2005, 99.7% of households consented and responded,  
49 in which 98.1% of eligible women consented and responded. In 2010, 99.8% of households consented  
50 and responded, in which 99.1% of women consented and responded.

51  
52 The household, woman, and man questionnaires are available in Appendix F of the 2005 and 2010  
53 Rwanda DHS reports.<sup>5,6</sup> These surveys were implemented by the Rwanda Ministry of Health and  
54 Population with technical assistance from ICF International and funding from the USAID | MeasureDHS  
55 Project. Ethical review for this survey was provided by Governments of Rwanda and the USA.

56  
57

### 58 *3. Comparison Group & Propensity Score Matching*

59  
60 We performed two analyses to try to refine our choice of comparison group based on recommendation  
61 by Rubin.<sup>7</sup> First, we limited our comparison to other areas in Eastern Province (roughly the boundary of  
62 old Umutara district), located in proximity to the intervention area (roughly the boundary of old  
63 Kibungo district). However, southeast Rwanda (Kigungo) where the intervention area was located had a

64 higher under-five mortality rate than any other region of the country, including the rest of Eastern  
 65 Province (Umutara), and comparison of indicators were mixed (Table s2).

66

67 Table s2. Summary of baseline health system output and health outcome indicators

|                              | Kibungo<br>(roughly K/SK) | Umutara (Rest<br>of Eastern Prov) | Byumba | Ruhengeri | Gisenyi | Kibuye | Cyangugu | Gikongoro | Butare | Gitarama | Kigali Ngali | Kigali | Rural |
|------------------------------|---------------------------|-----------------------------------|--------|-----------|---------|--------|----------|-----------|--------|----------|--------------|--------|-------|
| <b>HEALTH SYSTEM OUTPUTS</b> |                           |                                   |        |           |         |        |          |           |        |          |              |        |       |
| <b>CHILDREN</b>              |                           |                                   |        |           |         |        |          |           |        |          |              |        |       |
| Excl breastfeed mo           | 5.2                       | 5.7                               | 6.1    | 6.3       | 6.0     | 6.1    | 4.7      | 6.8       | 5.8    | 5.1      | 5.8          | 3.7    | 5.8   |
| DPT3 vaccine                 | 85.6                      | 89.7                              | 81.5   | 93.1      | 79.5    | 96.3   | 79.8     | 95.0      | 92.2   | 90.6     | 83.4         | 80.0   | 87.3  |
| Measles vaccine              | 73.9                      | 74.6                              | 85.7   | 93.0      | 74.4    | 92.4   | 87.5     | 93.0      | 94.9   | 94.0     | 80.7         | 85.5   | 85.0  |
| ARI & treated                | 22.5                      | 23.8                              | 31.4   | 29.2      | 20.0    | 17.6   | 20.5     | 15.3      | 28.5   | 39.1     | 26.8         | 46.7   | 24.5  |
| Diarrhea & ORT               | 27.5                      | 30.2                              | 24.6   | 29.1      | 33.8    | 34.8   | 31.7     | 36.9      | 33.7   | 40.2     | 28.5         | 44.1   | 30.8  |
| Fever & antimalarial         | 18.5                      | 16.7                              | 8.1    | 5.1       | 2.5     | 1.5    | 15.8     | 2.8       | 14.1   | 31.8     | 22.1         | 9.0    | 12.6  |
| <b>WOMEN</b>                 |                           |                                   |        |           |         |        |          |           |        |          |              |        |       |
| 1+ ANC                       | 97.1                      | 95.9                              | 95.9   | 95.7      | 93.0    | 93.6   | 92.6     | 93.4      | 94.2   | 96.8     | 91.5         | 92.2   | 94.7  |
| Skilled attendance           | 46.0                      | 40.4                              | 30.6   | 32.3      | 28.6    | 28.8   | 52.6     | 18.6      | 45.9   | 48.7     | 31.2         | 70.3   | 34.6  |
| Caesarean                    | 2.2                       | 2.1                               | 1.7    | 1.7       | 1.8     | 2.0    | 5.3      | 1.7       | 2.6    | 5.3      | 0.8          | 11.5   | 2.2   |
| PNC 48 hours                 | 1.8                       | 4.1                               | 5.2    | 2.0       | 6.9     | 0.8    | 3.7      | 1.7       | 2.1    | 7.8      | 1.6          | 8.3    | 3.5   |
| Unmet need                   | 37.0                      | 40.3                              | 36.8   | 44.2      | 38.3    | 39.2   | 38.1     | 38.5      | 38.2   | 36.3     | 35.8         | 29.2   | 38.4  |
| Modern contraception         | 10.0                      | 8.2                               | 9.6    | 8.7       | 10.1    | 8.2    | 13.1     | 4.3       | 6.4    | 12.9     | 8.2          | 28.0   | 8.6   |
| <b>HEALTH OUTCOME</b>        |                           |                                   |        |           |         |        |          |           |        |          |              |        |       |
| <b>CHILDREN</b>              |                           |                                   |        |           |         |        |          |           |        |          |              |        |       |
| ARI                          | 27.3                      | 16.6                              | 24.9   | 13.4      | 14.9    | 8.8    | 21.0     | 19.2      | 21.3   | 13.1     | 6.1          | 20.4   | 16.9  |
| Diarrhea                     | 18.5                      | 14.5                              | 16.2   | 16.6      | 13.8    | 7.5    | 16.9     | 17.6      | 19.7   | 7.2      | 7.5          | 12.3   | 14.4  |
| Fever                        | 38.5                      | 28.6                              | 22.2   | 27.7      | 26.2    | 12.5   | 28.0     | 28.0      | 37.9   | 22.1     | 13.9         | 26.6   | 26.4  |
| Stunting                     | 43.2                      | 38.6                              | 49.0   | 53.4      | 47.4    | 53.2   | 41.5     | 55.8      | 40.2   | 42.8     | 43.9         | 28.2   | 47.3  |
| Wasting                      | 3.4                       | 4.0                               | 4.2    | 2.9       | 1.8     | 2.8    | 4.0      | 5.8       | 5.3    | 4.2      | 4.3          | 6.7    | 3.9   |
| U5MR (0-9 years)             | 232                       | 207                               | 182    | 196       | 178     | 150    | 184      | 163       | 213    | 155      | 186          | 98     | 192   |
| IMR (0-9 years)              | 127                       | 111                               | 97     | 101       | 92      | 86     | 122      | 97        | 124    | 97       | 105          | 54     | 108   |
| NNMR (0-9 years)             | 45                        | 44                                | 51     | 45        | 34      | 50     | 50       | 48        | 46     | 48       | 44           | 24     | 46    |
| mCCI (calculated)            | 60.3                      | 59.9                              | 59.3   | 60.5      | 56.8    | 60.8   | 60.7     | 59.5      | 64.0   | 67.0     | 58.9         | 69.8   | 60.1  |

68 Source: 2005 Demographic and Health Survey Final Report<sup>5</sup>

69

70 Secondly, we used propensity score matching with inverse probability of treatment weights to identify  
 71 a comparison group from all other rural areas. However, propensity score matching did not result in a  
 72 balanced comparison group (Table s3).

73

74

75

76

77

78 Table s3. Summary of balancing diagnostics for different potential comparison groups

| Matching Scheme              | Mean Bias | Median Bias | B    | R     |
|------------------------------|-----------|-------------|------|-------|
| KSK versus ORA               | 78.9      | 40.6        | 341* | 0.5   |
| KSK versus Eastern Province† | 133.0     | 52.3        | 303* | 32.0* |
| KSK versus matched from ORA  | 15.4      | 14.7        | 146* | 74.7* |

\* if B>25%, R outside [0.5,2.0]

† Average rainfall in July and October omitted from matching exercise because lack of variability in values predicted data perfectly

79

80 Thus, we used all other rural areas as a comparison to maximize sample size, and adjusted models for  
 81 household wealth and woman’s age which differed between Kirehe/S. Kayonza and other rural areas at  
 82 baseline.

83

84

85 *4. Mortality estimates*

86

87 Mortality is estimated using synthetic cohort lifetables based on women’s report of complete birth  
 88 histories of all of their own births (“birth roster” generates childhood mortality estimates) and all of  
 89 their mothers’ births (“sibling roster” generates adult mortality estimates) as recommended by The  
 90 MeasureDHS project.<sup>8</sup> In the birth roster, women are asked to report the month and year of each  
 91 child’s birth, whether they are alive at the time of interview, and if not, the child’s age at death. Age is  
 92 recorded in days for children under 30 days, in months for children 1-23 months, and in years for 24  
 93 months and higher. The MeasureDHS project imputes month and year of death based on this  
 94 information for all children/siblings who died. Error is introduced when mothers do not remember  
 95 exact birth or death dates, or they round ages to the nearest month or year. Missing ages are imputed  
 96 using a “hot deck” method which means that the age of death is taken from the first preceding person  
 97 in the dataset who has the same birth order and age-of-death type (day, month, year).

98

99 The life table approach tracks counts of individuals in one-month or one-year age cohorts as they age  
 100 through a time window up to a certain age threshold. All mortality rates in this analysis were generated  
 101 with the last five-year window of data. The window starts five years before the date of the first  
 102 interview and ends on the date of the first interview.

103

104 Figure s1. Diagram of data contributing to under-five mortality synthetic life table estimate

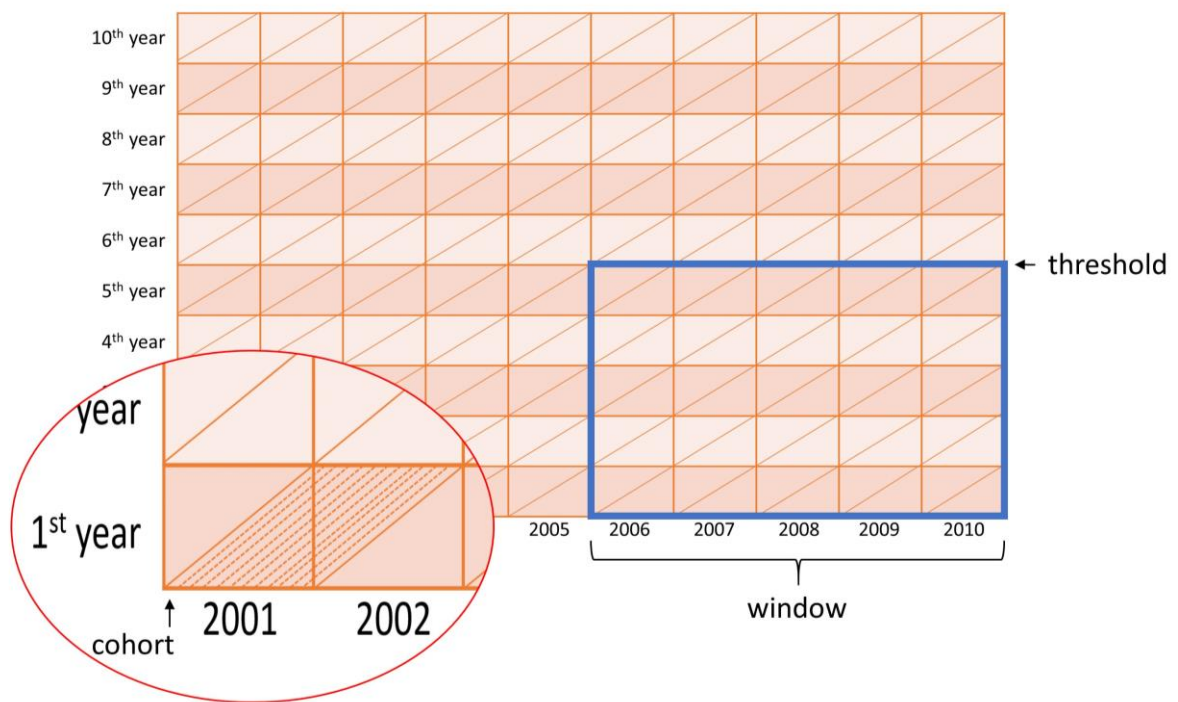

105

106

107 Childhood mortality calculations are based on one-month cohorts. Children under age five born more  
 108 than five years ago are truncated and start contributing person-months to the analysis when they enter  
 109 the five-year window. The threshold age for neonates is one month, for infants it is 12 months, and for  
 110 children under age five it is 60 months.

111

112 Neonatal mortality: number of deaths before age 1 month, divided by the cumulative person-  
 113 months lived before age 1 month in the last five years, multiplied by 1000

114

115 Infant mortality: number of deaths before age 12 months, divided by the cumulative person-  
116 months lived before age 12 months in the last five years, multiplied by 1000

117

118 Under-five mortality: number of deaths before age 60 months, divided by the cumulative  
119 person-months lived before age 60 months in the last five years, multiplied by 1000

120

121 In the adult analysis, mortality calculations are based on one-year cohorts. Siblings alive five years  
122 before the first interview start contributing person-years to the analysis when they enter the window.

123 There was no age threshold for adult mortality estimates.

124

125 Adult mortality: number of deaths, divided by cumulative person-years lived in the last five  
126 years, multiplied by 10,000

127

128

## 129 5. *Difference-in-difference models*

130

131 A linear regression model was used to compare trends in the intervention area with trends in the  
132 comparison area between 2005 and 2010. Equation 1 is a classic difference-in-differences model with  
133 binary values for time and group membership. When a binary outcome is analyzed with this linear  
134 model, the time-group interaction term effect estimate can be directly interpreted as the proportion  
135 difference-in-differences. Although binary outcomes follow a binomial distribution and should be  
136 analyzed with a logit or logistic model, *differences* between a binary outcome at time 0 and time 1, or  
137 between group 0 and group 1, follow a normal distribution and can be analyzed with a linear model.<sup>9</sup>

138

$$139 y_i = \beta_0 + \beta_1(t_i) + \beta_2(g_i) + \beta_3(t_i * g_i) + \beta_{4...k}(X_i) \quad (1)$$

140

141 Where:

142

143  $y_i$  binary outcome of interest for individual  $i$

144  $\beta_0$  intercept

145  $\beta_1$  effect size of time between 2005 and 2010

146  $\beta_2$  effect size of intervention group compared to comparison group

147  $\beta_3$  difference-in-differences effect size (can be directly interpreted as the DID proportion)

148  $\beta_{4...k}$  matrix of effect sizes corresponding with covariates

149  $t_i$  year in which individual  $i$  was interviewed (2005=0, 2010=1)

150  $g_i$  group to which individual  $i$  belongs (comparison=0, intervention=1)

151

152 This model was implemented in Stata using svyset commands to adjust for clustering of observations in  
153 primary sampling units, and sampling probability weights.

154

155 We provide an excerpt of this Stata code below which can be adapted in other similar program  
156 evaluations. Before modeling, we appended the 2005 and 2010 datasets and generated a series of  
157 variables. In this model, “subpop\_outcome” is binary where 1 identifies individuals included in the  
158 subpopulation and 0 identifies individuals excluded from the subpopulation; “outcome” is binary where  
159 1 identifies a characteristic like diarrhea is present and 0 otherwise; “group” is binary where 0 identifies  
160 individuals in the comparison group and 1 identifies individuals in the intervention group, “time” is  
161 binary where 0 identifies individuals in the 2005 survey and 1 identifies individuals in the 2010 survey;  
162 “mother\_age” is v012 representing age in years, and “hh\_wealth” is v190 representing a continuous  
163 value of household wealth.

164

```
165 generate weight = v005/1000000
```

```
166 svyset [pweight = weight], psu(v021)
```

```
167 svy, subpop(subpop_outcome): regress outcome i.group i.year i.group#i.year mother_age hh_wealth
```



168 6. Comparison of trends graphs

169 Figure s2. Health System Outputs 2005-2010 in Kirihe/S. Kayonza and Other Rural Areas, Children

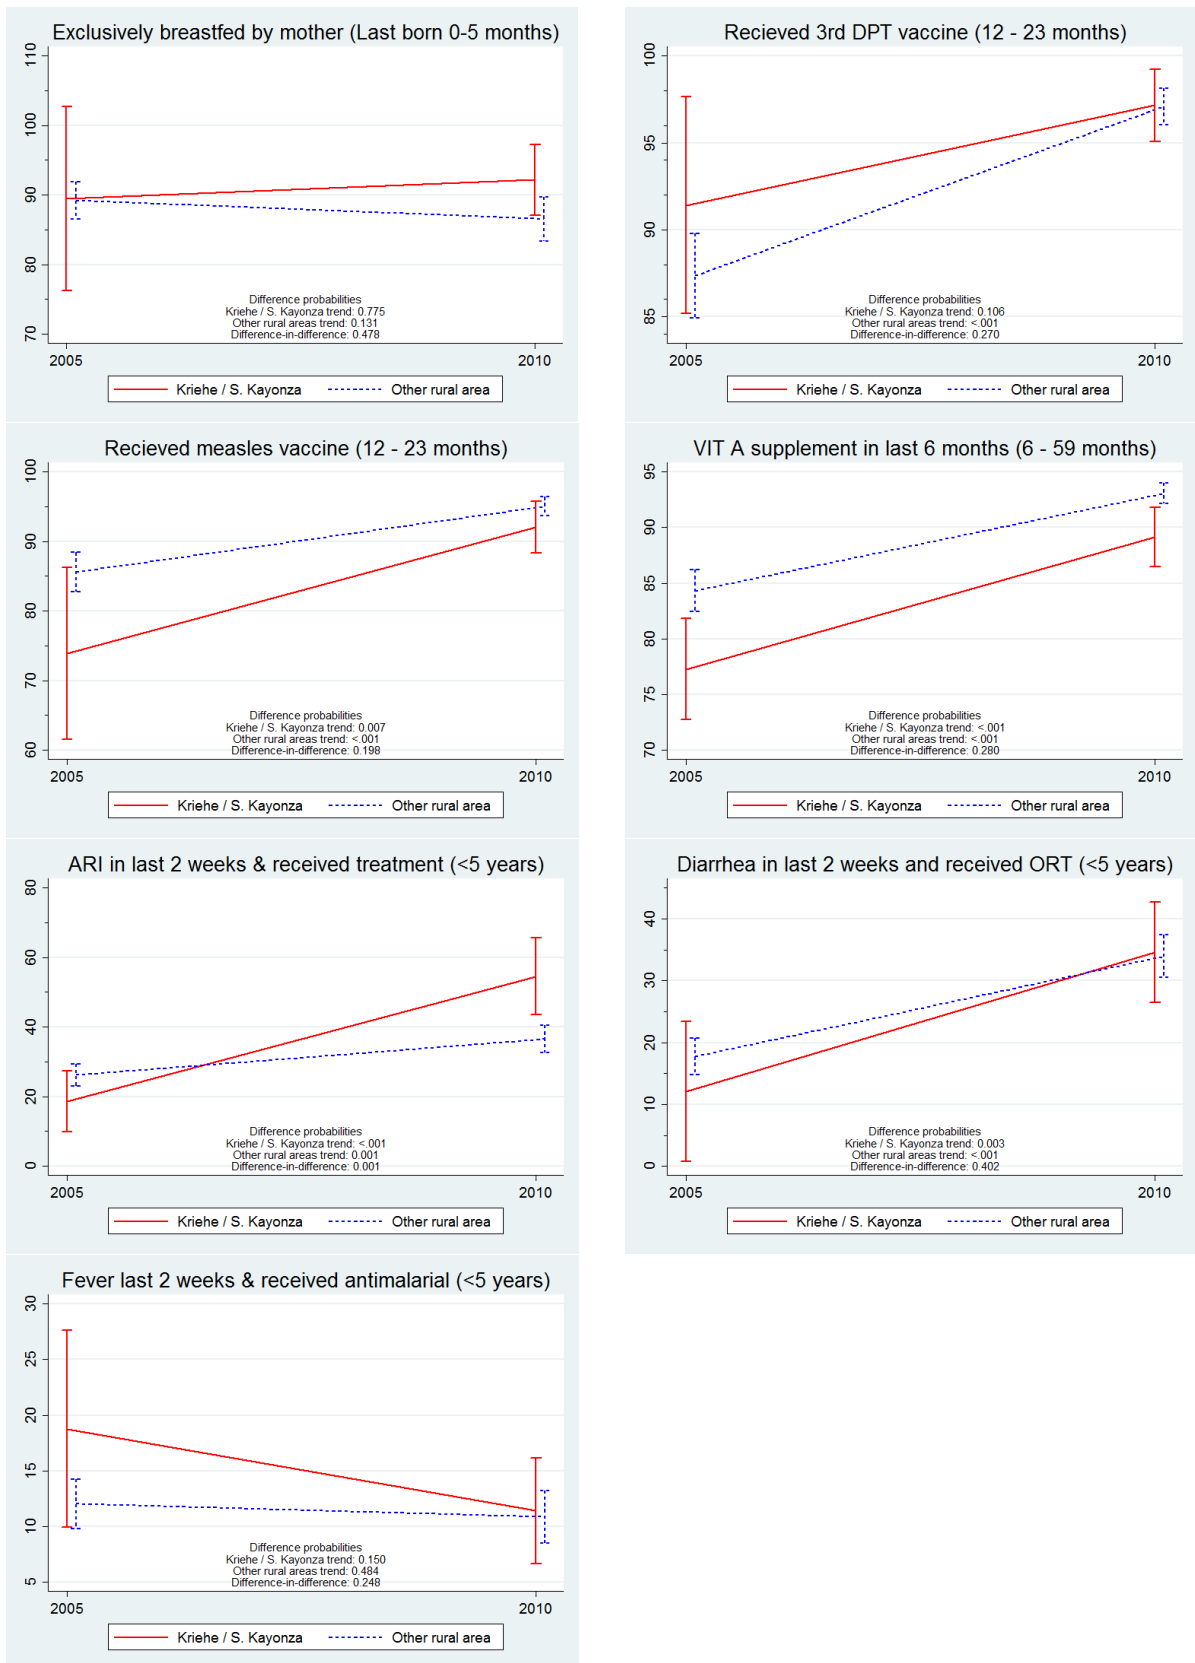

171 Figure s3. Health System Outputs 2005-2010 in Kirihe/S. Kayonza and Other Rural Areas, Women

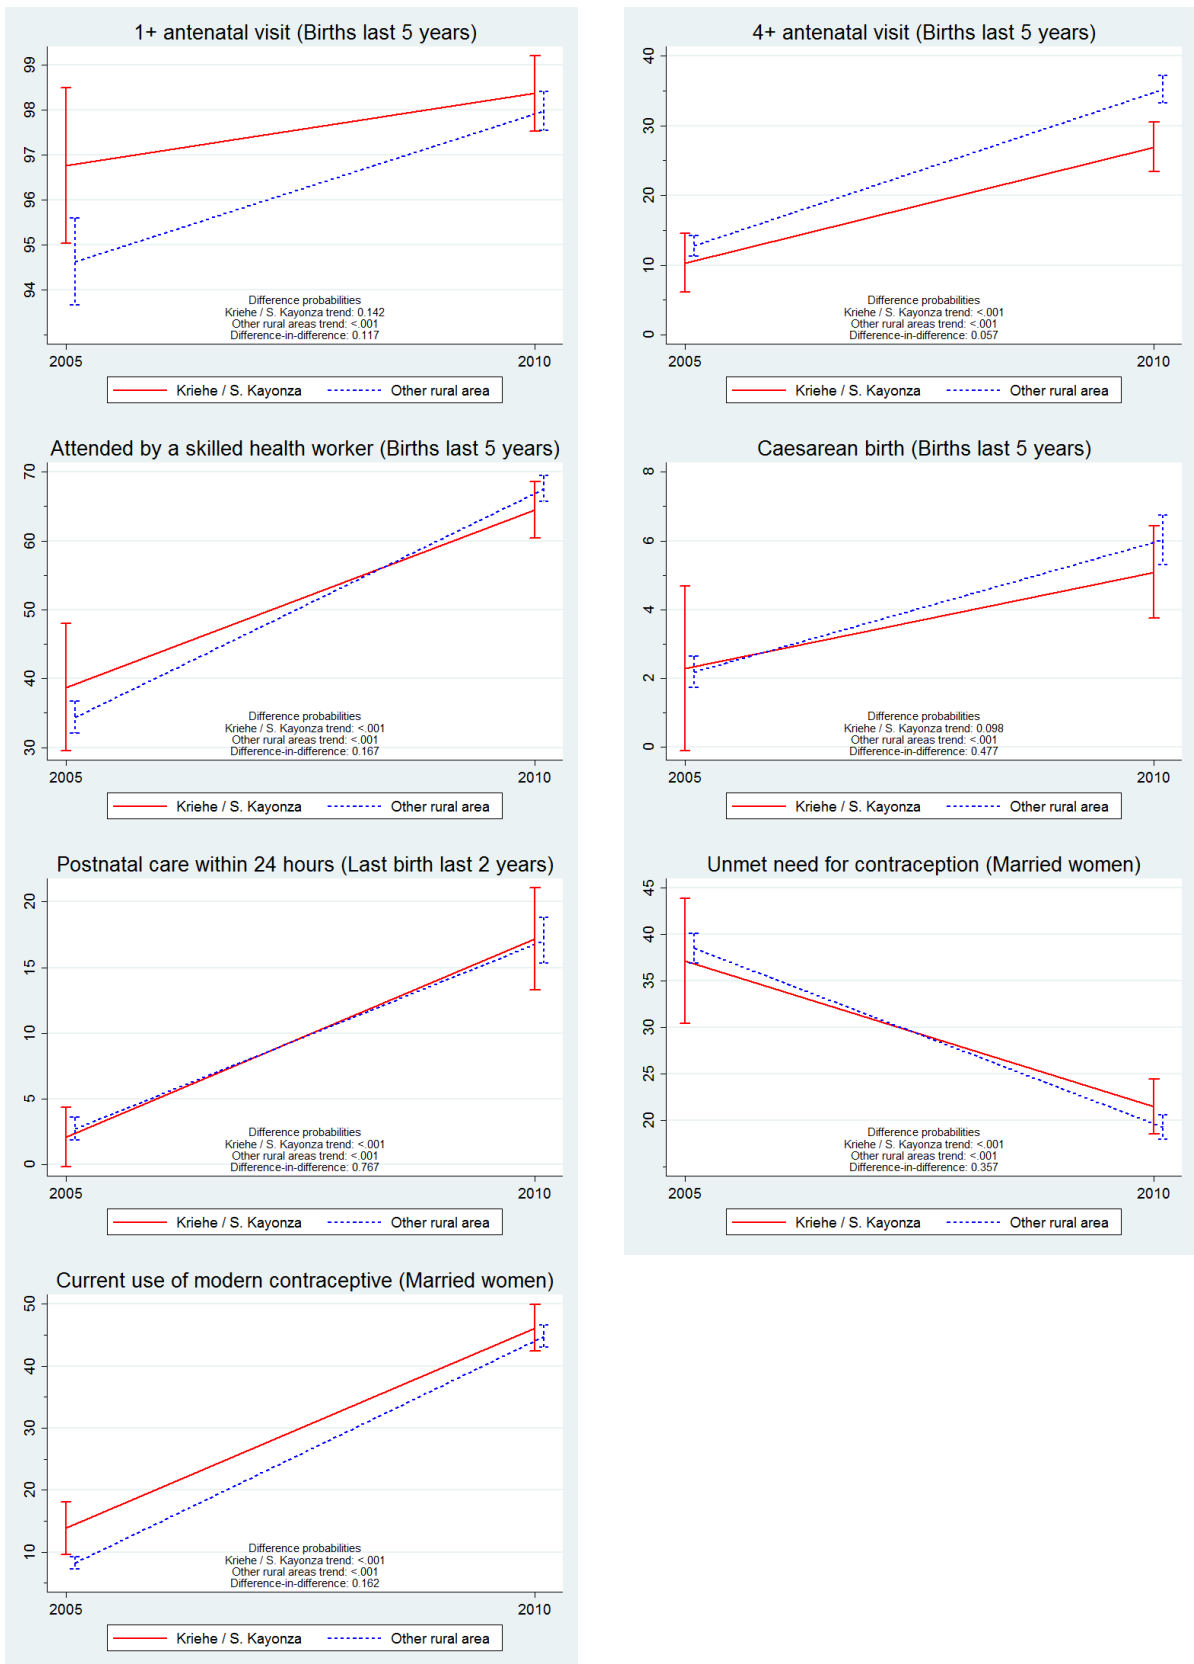

172

173

174 Figure s4. Child Health Outcomes 2005-2010 in Kirihe/S. Kayonza and Other Rural Areas

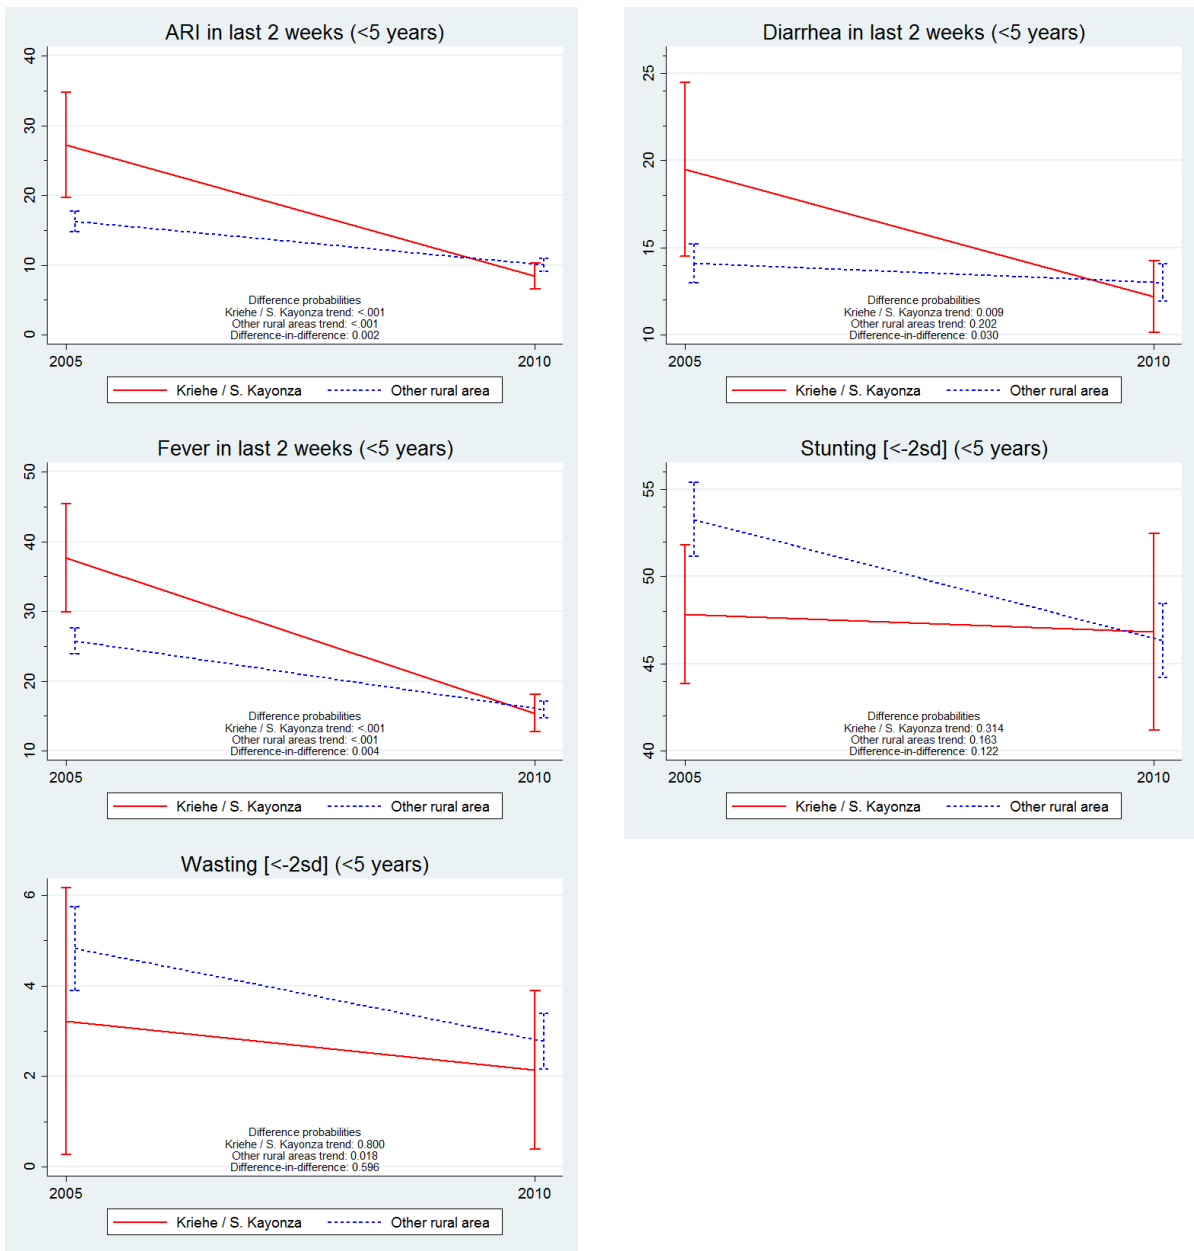

175

176

177 Figure s5. Adult Health Outcomes 2005-2010 in Kirehe/S. Kayonza and Other Rural Areas

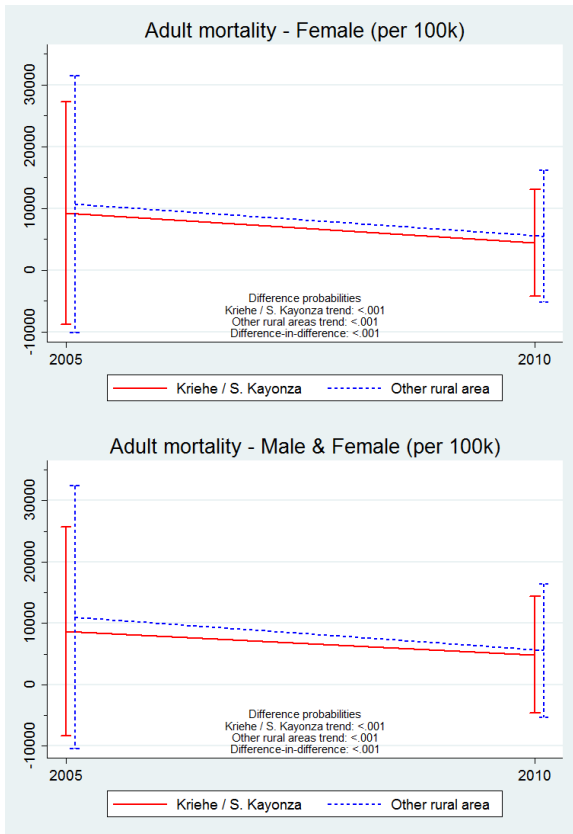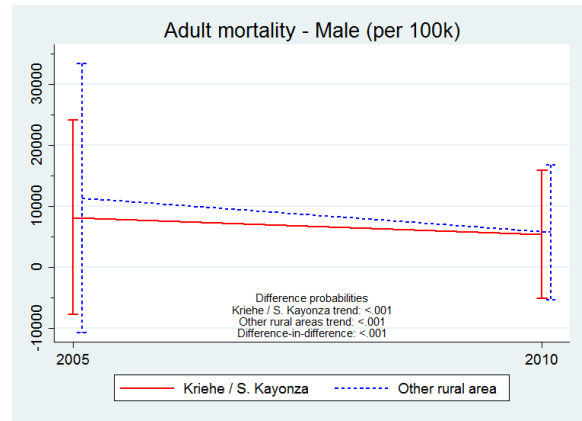

178

179

180 REFERENCES

- 181 1. Government of Rwanda. Health Sector Strategic Plan 2005-2009. Kigali: Government of Rwanda; 2004.  
182 Available from: <http://www.equinetafrica.org/sites/default/files/uploads/documents/RWArights02.pdf>.  
183
- 184 2. Rwanda Ministry of Health (RMOH). Norms relatives au poste de santé communautaire, Centre de santé et  
185 Hôpital de District. Kigali: RMOH; 2007.  
186
- 187 3. Condo J, Mugeni C, Naughton B, Hall K, Tuazon MA, Omwega A, et al. Rwanda's evolving community health  
188 worker system: a qualitative assessment of client and provider perspectives. *Hum Resour Health*.  
189 2014;12:doi:10.1186/1478-4491-12-71.  
190
- 191 4. ICF International. Demographic and Health Survey Interviewer's Manual. Calverton, MD; 2012.  
192 [http://www.dhsprogram.com/pubs/pdf/DHSM1/DHS6\\_Interviewer\\_Manual\\_19Oct2012\\_DHSM1.pdf](http://www.dhsprogram.com/pubs/pdf/DHSM1/DHS6_Interviewer_Manual_19Oct2012_DHSM1.pdf)  
193
- 194 5. Institut National de la Statistique du Rwanda (INSR), ORC Macro. Rwanda Demographic and Health Survey  
195 2005. Calverton, MD; 2006. <http://www.measuredhs.com/pubs/pdf/FR183/FR183.pdf>.  
196
- 197 6. National Institute of Statistics of Rwanda (NISR), Ministry of Health (MOH), ICF International. Rwanda  
198 Demographic and Health Survey 2010. Calverton, MD; 2012.  
199 <http://www.measuredhs.com/pubs/pdf/FR259/FR259.pdf>.  
200
- 201 7. Rubin DB. Using Propensity Scores to Help Design Observational Studies: Application to the Tobacco Litigation.  
202 *Heal Serv Outcomes Res Methodol*. 2001;2(3):doi: 10.1023/A:1020363010465.  
203
- 204 8. Rutstein SO, Rojas G. Guide to DHS Statistics. Calverton, MD; 2006.  
205 [https://dhsprogram.com/pubs/pdf/DHSG1/Guide\\_to\\_DHS\\_Statistics\\_29Oct2012\\_DHSG1.pdf](https://dhsprogram.com/pubs/pdf/DHSG1/Guide_to_DHS_Statistics_29Oct2012_DHSG1.pdf)  
206
- 207 9. Gertler PJ, Martinez S, Premand P, Rawlings LB, Vermeersch CMJ. *Impact Evaluation in Practice*. Washington,  
208 DC; 2011. [https://siteresources.worldbank.org/EXTHDOFFICE/Resources/5485726-](https://siteresources.worldbank.org/EXTHDOFFICE/Resources/5485726-1295455628620/Impact_Evaluation_in_Practice.pdf)  
209 [1295455628620/Impact\\_Evaluation\\_in\\_Practice.pdf](https://siteresources.worldbank.org/EXTHDOFFICE/Resources/5485726-1295455628620/Impact_Evaluation_in_Practice.pdf)
